# Supplementary material for: Chromatin Landscape Underpinning Human Dendritic Cell Heterogeneity
Source: PubMed Central journal article supplement — Cell Rep. Author manuscript; Available in PMC 2020 Oct 9. (PMC7546547; doi:10.1016/j.celrep.2020.108180), 2020-09-22
Supplement: NIHMS1631918-supplement-1.pdf [file NIHMS1631918-supplement-1.pdf]

**Cell Reports, Volume 32**

## **Supplemental Information**

### **Chromatin Landscape Underpinning**

### **Human Dendritic Cell Heterogeneity**

**Rebecca Leylek, Marcela Alcántara-Hernández, Jeffrey M. Granja, Michael Chavez, Kimberly Perez, Oscar R. Diaz, Rui Li, Ansuman T. Satpathy, Howard Y. Chang, and Juliana Idoyaga**

**Figure S1 (related to Figure 1)**

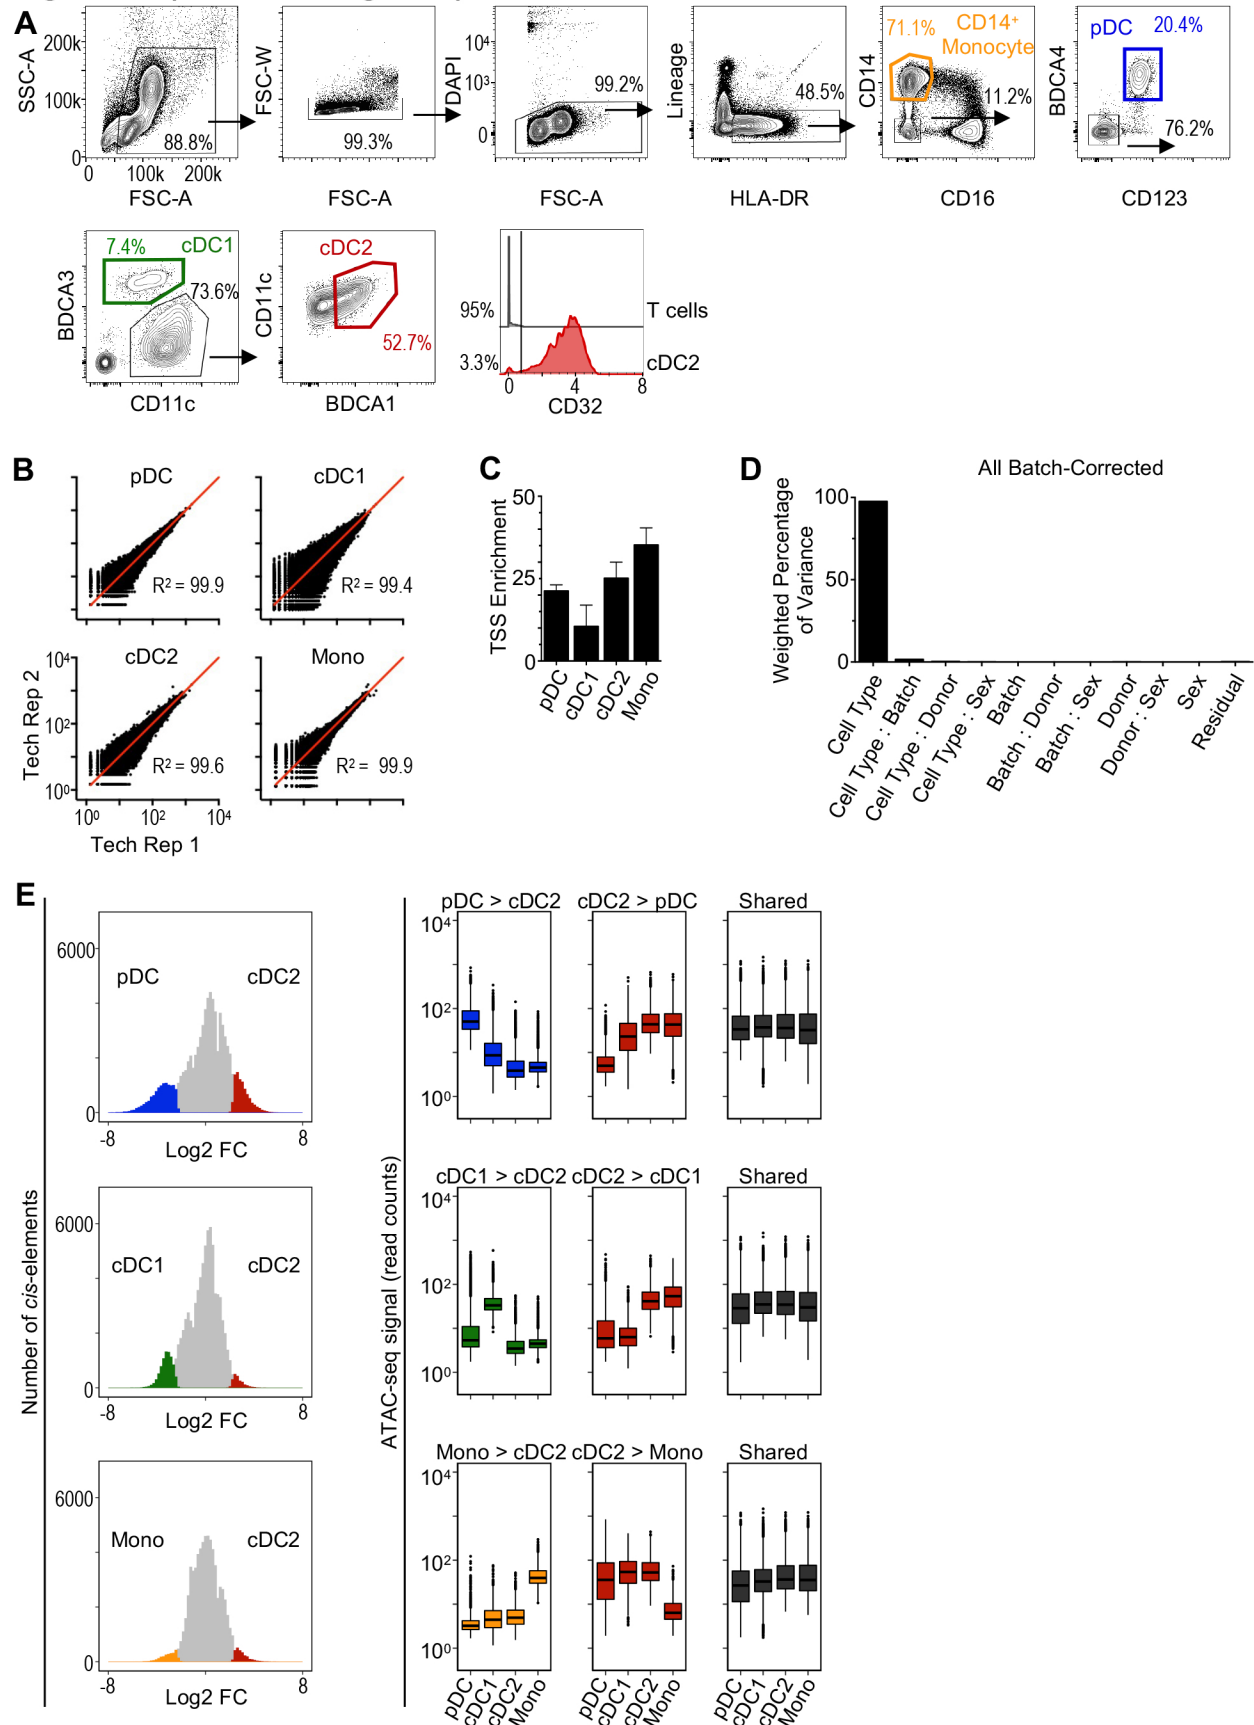

**Figure S1 (related to Figure 1): Gating strategy and quality metrics for ATAC-seq of primary human DCs.**

(A) Primary human pDCs, cDC1, cDC2, and CD14<sup>+</sup> monocytes were negatively enriched then sorted from healthy human blood and analyzed by ATAC-seq. Right histogram shows that less than 3.5% of our purified cDC2 corresponded to CD32<sup>-</sup> DC3. Shown is 1 representative donor of 7. (B) One-to-one comparison showing concordance between technical replicates for representative donor samples. (C) TSS enrichment scores (n=7-14 samples per subset). (D) Percentage of variance attributable to indicated factors for PCA in Figure 1B, determined by principle variance component analysis (PVCA). (E) Left: Histograms showing differentially accessible *cis*-elements between cDC2 and pDCs, cDC1, and monocytes. Boxplots of ATAC-seq signal in shared or differentially accessible *cis*-elements from indicated comparisons. Bar graphs shown as mean +/- SD.

**Figure S2 (related to Figure 2)**

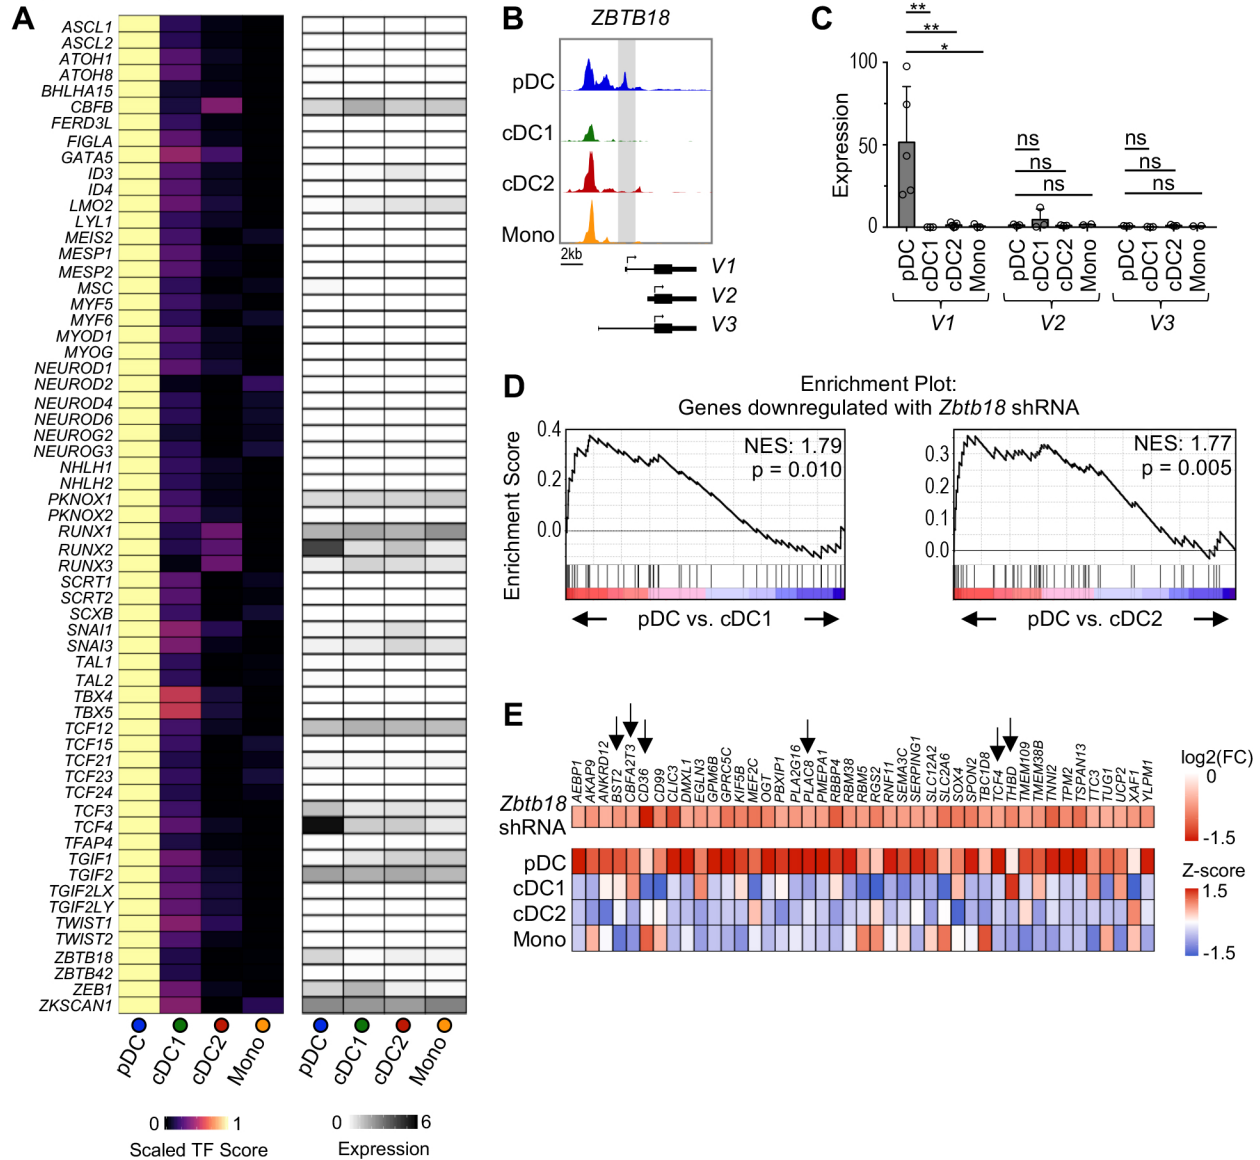

**Figure S2 (related to Figure 2): TF scores and RNA expression for pDC-specific TFs.**

(A) Analysis of pDC-specific TFs. Left: chromVAR analysis revealed 62 TFs with significantly increased activity in pDCs compared to cDC1, cDC2, and monocytes ( $\Delta\text{TF score} > 0.05$  and  $p\text{-adj} < 0.05$  in all pairwise comparisons). Right: RNA expression of indicated TFs using data from Villani et al. (2017). Color indicates average expression across all single cells for each cell type. (B) Genome tracks of the *ZBTB18* locus from 1 representative donor showing all three transcript variants. (C) Expression of *ZBTB18* transcript variants measured by RT-PCR,  $n=2-5$  in 2-5 exp. Expression indicates  $\Delta\Delta\text{Cq}$  relative to the internal control gene *RPL13A* and cDC2. Statistics determined by one-way ANOVA with Dunnett's multiple comparisons test. Bar graphs shown as mean  $\pm$  SD. (D) Gene Set Enrichment Analysis (GSEA) showing significant overlap between genes downregulated after *Zbtb18* silencing in C2C12 mouse myoblast cell line (data from Yokoyama et al., 2009) and pDC genes (data from Villani et al., 2017). (E) Heatmap of overlapped genes from (D). Top: log2 fold change for gene expression after *Zbtb18* silencing compared to control shRNA. Bottom: Z-score of average RNA expression in human DCs. Arrows point to particular genes known to be expressed and functional in pDCs.

**Figure S3 (related to Figure 3)**

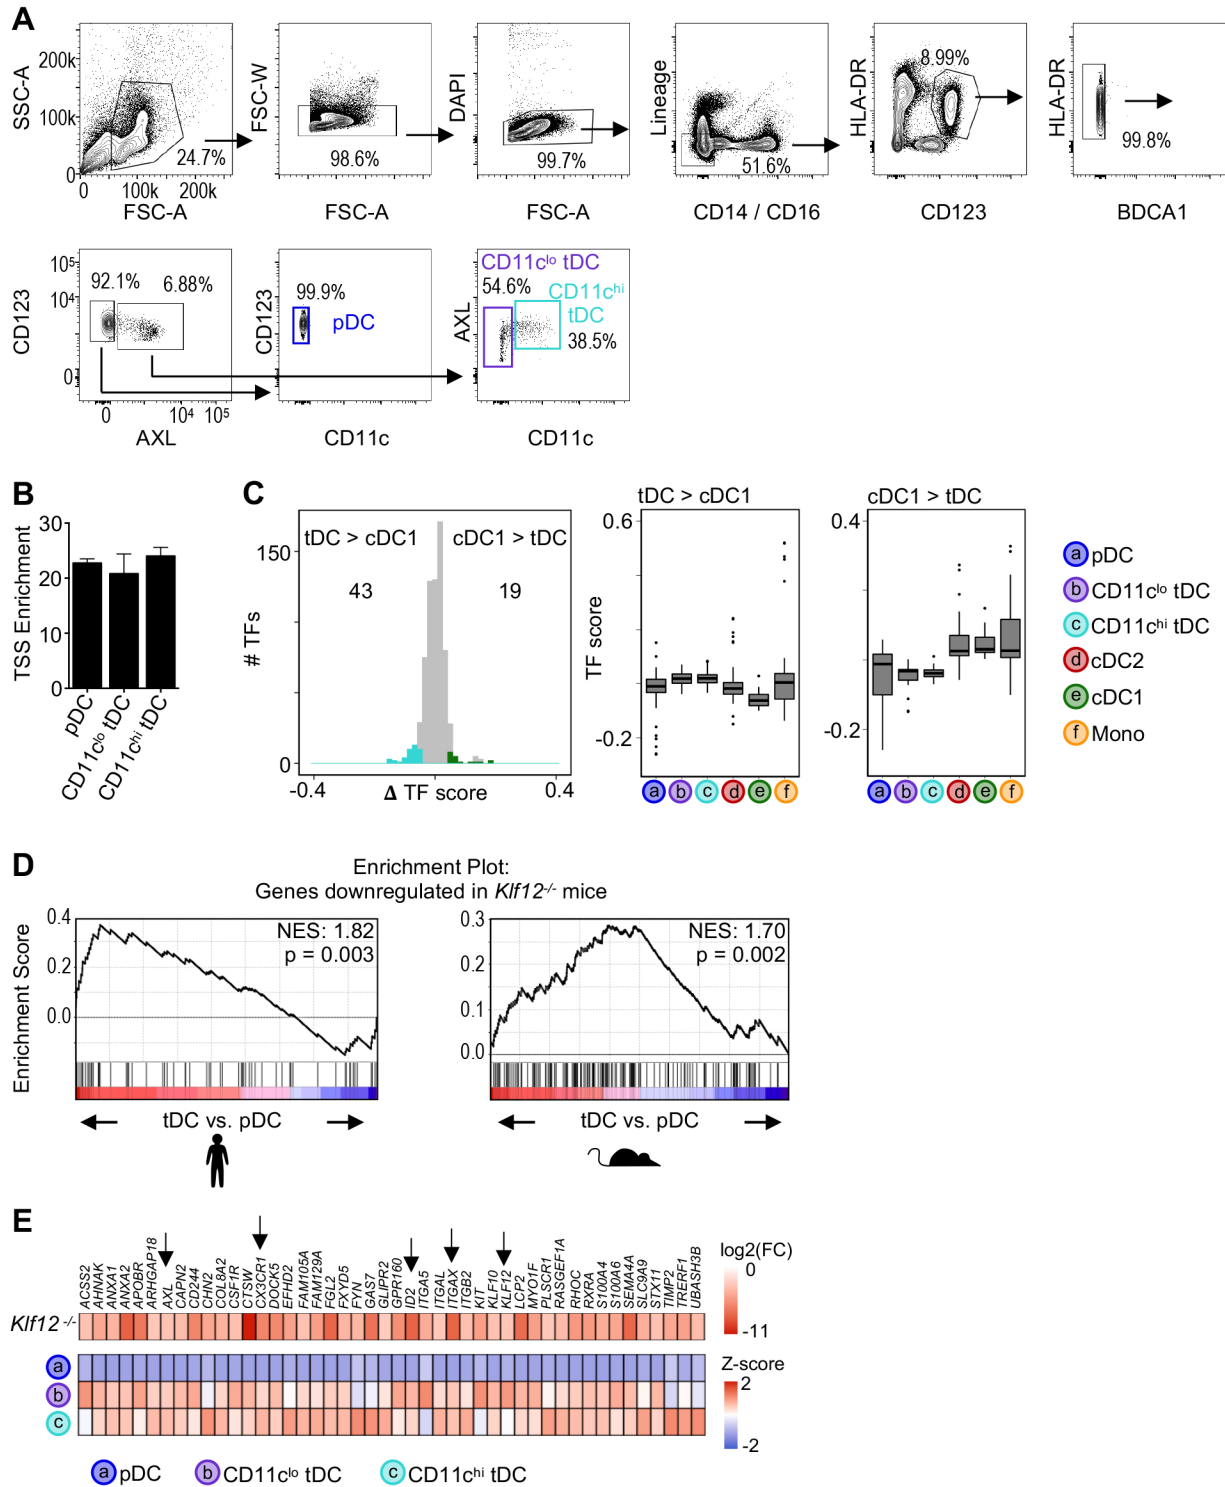

**Figure S3 (related to Figure 3): ATAC-seq of primary human tDCs using Omni-ATAC protocol.**

(A) Gating strategy used to isolate primary human bona fide pDCs, CD11c<sup>lo</sup> tDCs, and CD11c<sup>hi</sup> tDCs from blood. Shown is 1 representative donor of 4. (B) TSS enrichment scores (n=3-4 samples per cell type). Bar graphs shown as mean +/- SD. (C) Left: Histogram of difference in TF scores between cDC1 and CD11c<sup>hi</sup> tDCs. Colored points indicate significantly different TFs ( $\Delta$ TF score > |0.05| and p-adj < 0.05). Right: Boxplots of TF scores for differentially active TFs. (D) GSEA showing significant overlap between genes downregulated in *Klf12*<sup>-/-</sup> mouse natural killer (NK) cells (data from Lam et al., 2019) and tDC genes (data from Villani et al., 2017 and Lau et al., 2016). (E) Heatmap of overlapped genes from (D). Top: log<sub>2</sub> fold change in *Klf12*<sup>-/-</sup> mouse NK cells compared to wild type NK cells. Bottom: Z-score of average RNA expression in human DCs. Arrows point to particular genes known to be expressed by tDCs.

**Figure S4 (related to Figure 4)**

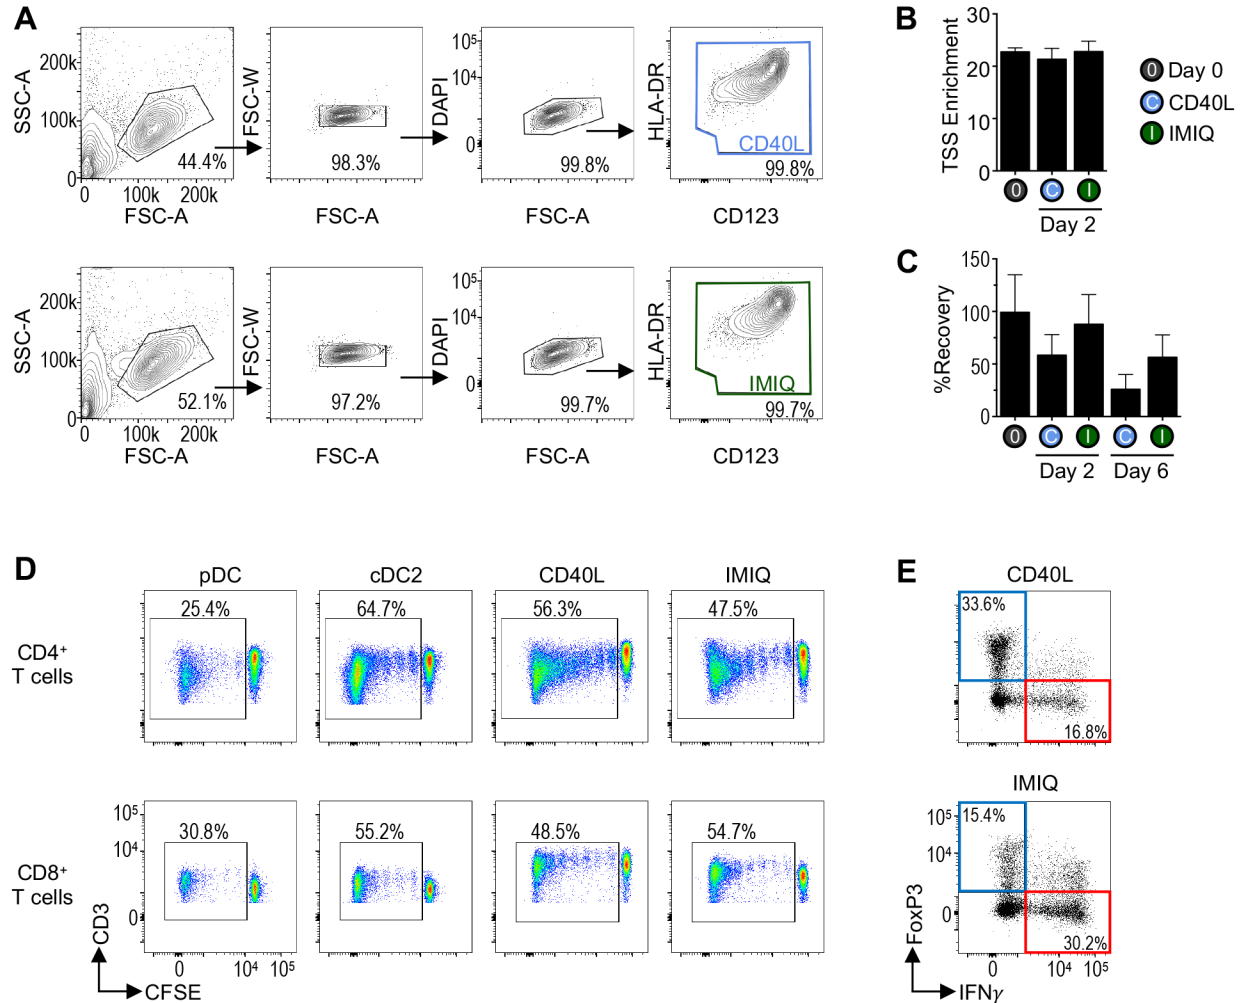

**Figure S4 (related to Figure 4): ATAC-seq of stimulated human pDCs using Omni-ATAC protocol.**

(A) Gating strategy for stimulated bona fide pDCs. Bona fide pDCs (purified to be free of tDCs) were sorted from blood as in Figure S3A. These purified pDCs were placed in culture with either CD40L or IMIQ for 2 days. After stimulation, cells were harvested and re-sorted, using the presented gating strategy to remove debris and dead cells (shown is 1 donor of 4). (B) TSS enrichment scores (n=3-4 samples per cell type). (C) Viability after 2- or 6-day culture of purified bona fide pDCs in the presence of CD40L or IMIQ, reported as percent recovery relative to Day 0 (n=3-14). (D) CFSE dilution of CD4<sup>+</sup> or CD8<sup>+</sup> T cells during MLR. CFSE-labeled T cells were co-cultured with purified allogeneic bona fide AXL<sup>-</sup> pDCs (DC:T cell ratio 1:20). cDC2 were included as a positive control. Alternatively, purified bona fide pDCs were stimulated for 2 days with CD40L or IMIQ, then re-counted and co-cultured with allogeneic T cells (DC: T cell ratio 1:20). T cells were analyzed after 5-6 days. (E) Transcription factor and cytokine gating in CD4<sup>+</sup>CFSE<sup>lo</sup> T cells (1 of 4 donors in 3 exp). After 5-6 days co-culture, T cells were restimulated with PMA/ionomycin in the presence of Brefeldin A to allow detection of cytokines by intracellular staining. Bar graphs shown as mean +/- SD.

**Figure S5 (related to Figure 5)**

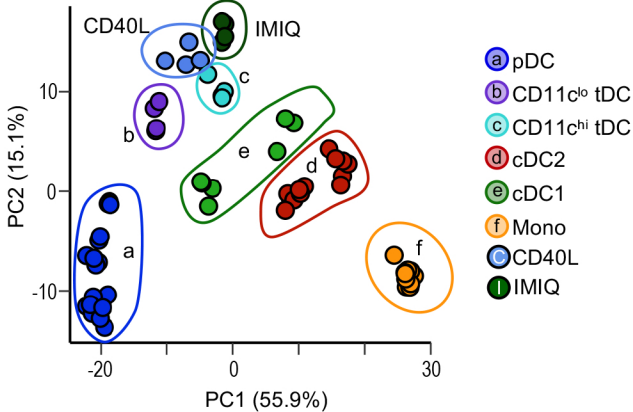

**Figure S5 (related to Figure 5): Combined analysis of stimulated tDCs and freshly isolated DC subsets.**  
PCA of all samples based on chromVAR TF scores. Only the top 500 most variable TFs (variability measured across cell types) were used to calculate the PCA.



**Figure S6 (related to Figure 6)**

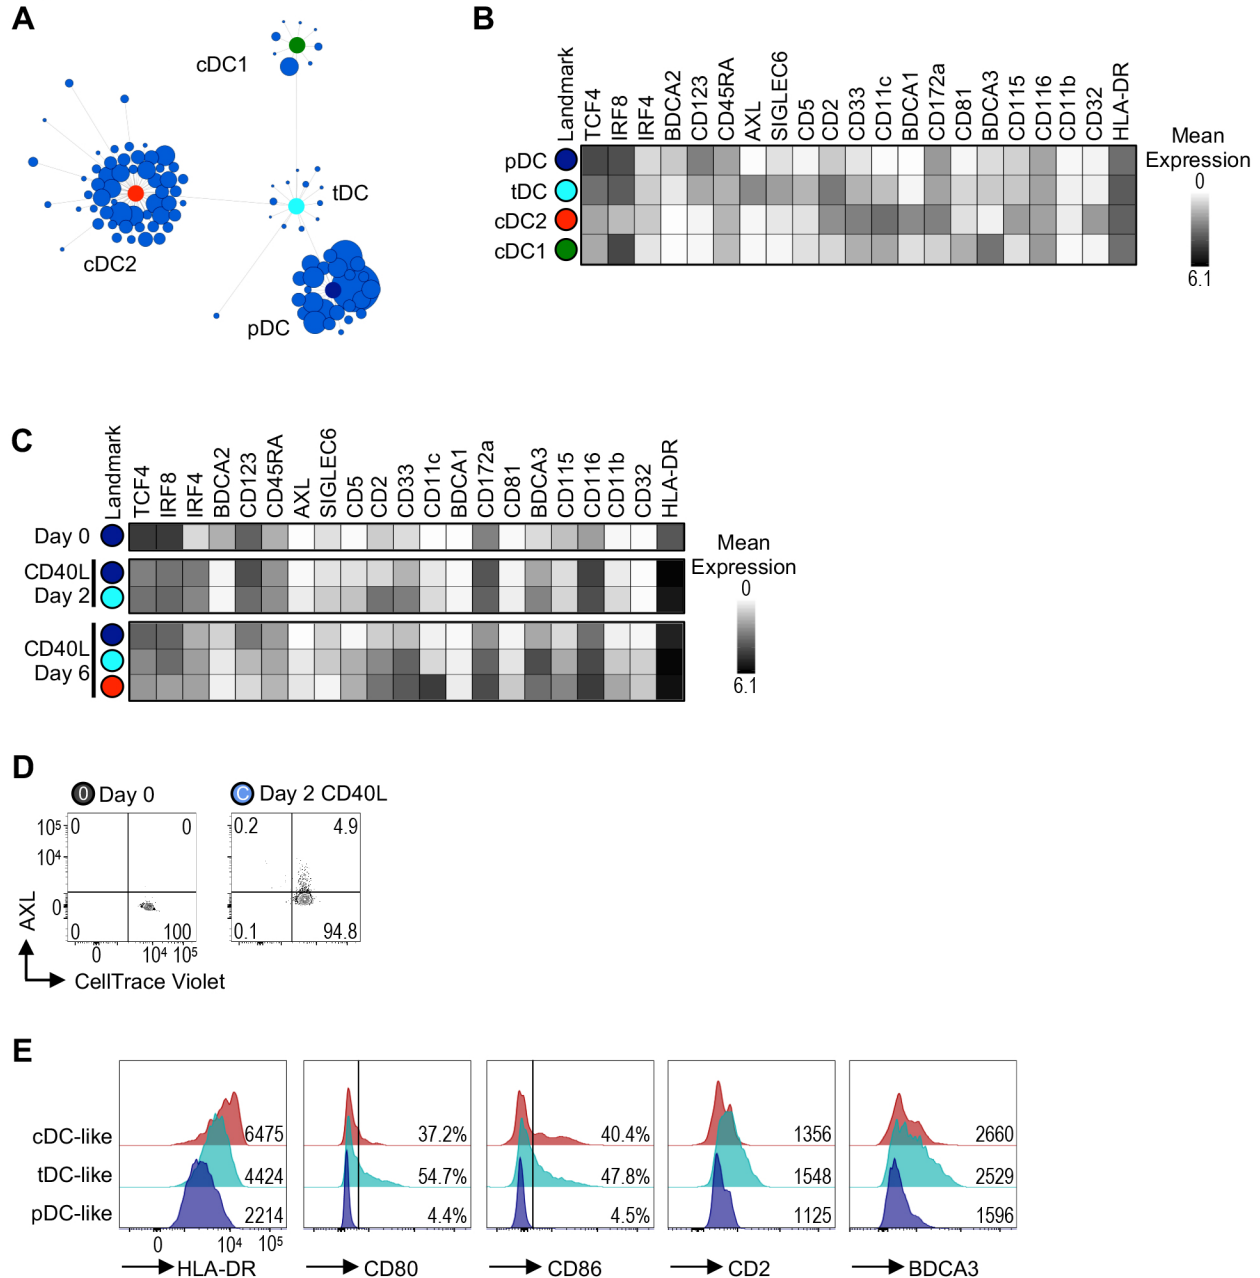

**Figure S6 (related to Figure 6): Validation of Scaffold map.**

(A) Scaffold map showing cells from HLA-DR<sup>+</sup> Lin<sup>-</sup> events from PBMCs falling into each established landmark as expected (1 representative exp. of 7). (B) Heatmap of average expression in cells mapping to each Scaffold landmark from (A) measured by CyTOF, demonstrating expected phenotypes for each DC subset. (C) Heatmap of average expression in stimulated pDCs mapping to each Scaffold landmark, measured by CyTOF. (D) PBMCs were labeled with CellTrace Violet (CTV). Bona fide pDCs (AXL<sup>-</sup>) were purified and analyzed immediately or cultured for 2 days in the presence of CD40L. Levels of CTV in AXL-expressing cells were analyzed at day 2. On average, ~96% of AXL-expressing cells in the pDC culture remained CTV<sup>high</sup> (shown is 1 donor of 4). (E) Marker expression in re-sorted stimulated pDCs that map to each landmark node (1 representative of 5). Numbers represent percent positive cells or gMFI.

**Figure S7 (related to Figure 7)**

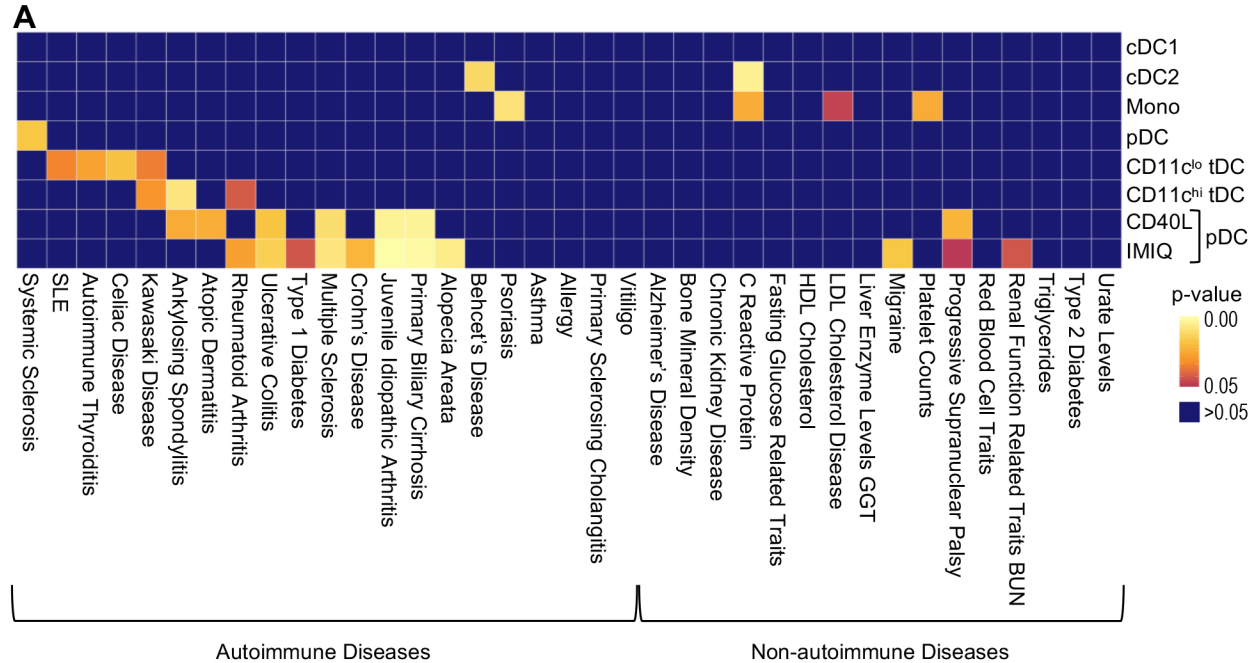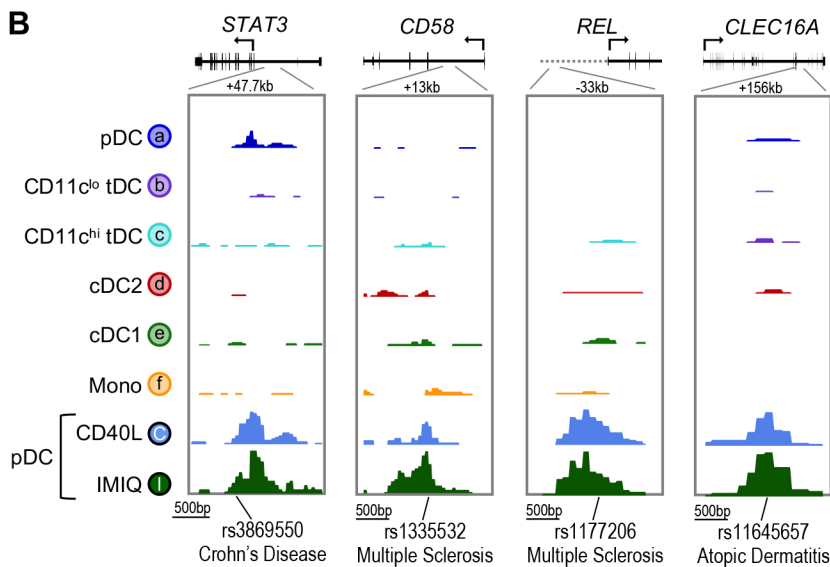

**Figure S7 (related to Figure 7): CHEERS enrichment of all autoimmune and non-autoimmune disease SNPs.**

(A) Enrichment p-values for 37 autoimmune and non-autoimmune diseases calculated with CHEERS. (B) Genome tracks for select *cis*-elements that overlap SNPs associated with autoimmune diseases with significant enrichment in stimulated pDCs.

**Table S1 (related to Figure 1). cDC2-specific *cis*-elements.**

| hg19_coordinates          | Nearest_gene | Distance_to_TSS | Annotation |
|---------------------------|--------------|-----------------|------------|
| chr2_35216528_35217029    | MYADML       | -1263495        | Intergenic |
| chr6_115365177_115365678  | HS3ST5       | -981387         | Intergenic |
| chr8_35897649_35898150    | KCNU1        | -743942         | Intergenic |
| chr8_142826677_142827178  | MROH5        | -309598         | Intergenic |
| chr7_125208810_125209311  | LOC101928254 | -304716         | Intergenic |
| chr7_19446874_19447375    | FERD3L       | -262081         | Intergenic |
| chr2_1257352_1257853      | TPO          | -159630         | Intron     |
| chr11_120302735_120303236 | GRIK4        | -79479          | Intron     |
| chr8_75392567_75393068    | MIR5681A     | -67960          | Intergenic |
| chr2_204462976_204463477  | RAPH1        | -63169          | Intergenic |
| chr10_120549509_120550010 | CACUL1       | -35002          | Intergenic |
| chr21_29300974_29301475   | MIR5009      | -17696          | Intergenic |
| chr10_2062963_2063464     | LINC00700    | -6672           | Intergenic |
| chr1_55272939_55273440    | LEXM         | 1454            | Intron     |
| chr1_87619932_87620433    | LINC01140    | 22574           | Intron     |
| chr3_54896487_54896988    | CACNA2D3-AS1 | 38544           | Intron     |
| chr11_123571520_123572021 | ZNF202       | 40592           | Intergenic |
| chr15_39916906_39917407   | THBS1        | 43877           | Intron     |
| chr5_160151361_160151862  | ATP10B       | 127607          | Intron     |
| chr8_70558297_70558798    | SULF1        | 153520          | Intron     |
| chr6_90841251_90841752    | BACH2        | 165060          | Intron     |
| chr13_29770503_29771004   | MTUS2        | 172006          | Intron     |
| chr18_72661521_72662022   | ZADH2        | 259509          | Intron     |
| chr3_55252601_55253102    | WNT5A        | 262574          | Intergenic |
| chr8_52307997_52308498    | PXDNL        | 413757          | Intron     |
| chr5_13403412_13403913    | DNAH5        | 540926          | Intergenic |

| <b>Metal</b> | <b>Antibody</b> | <b>Clone</b> | <b>Company</b>  |
|--------------|-----------------|--------------|-----------------|
| Y89          | CD45            | HI30         | Fluidigm        |
| In113        | CD45            | HI30         | Biolegend       |
| Pr141        | CD45RA          | HI100        | Biolegend       |
| Nd142        | TCF4            | NCI-R159-6   | Abcam           |
| Nd143        | CD2             | RPA-2.10     | Biolegend       |
| Nd144        | CD11b           | ICRF44       | Fluidigm        |
| Nd145        | CD32 (FcγRIIA)  | FUN-2        | Biolegend       |
| Nd146        | CD335 (NKp46)   | 9 E2         | Biolegend       |
| Sm147        | BDCA2 (CD303)   | 201A         | Fluidigm        |
| Nd148        | CD16 (FcγRIIIA) | 3G8          | Fluidigm        |
| Sm149        | CD127 (IL-7R)   | A019D5       | Fluidigm        |
| Nd150        | BDCA1 (CD1c)    | H149         | Biolegend       |
| Eu151        | CD123           | 6H6          | Fluidigm        |
| Sm152        | CD100           | REA316       | Miltenyi Biotec |
| Eu153        | CD1a            | L161         | Biolegend       |
| Sm154        | CD163           | GHI/61       | Fluidigm        |
| Gd155        | CD172a (SIRPa)  | SE5A5        | Biolegend       |
| Gd156        | CD33            | WM53         | Biolegend       |
| Gd157        | IRF4            | 3E4          | eBioscience     |
| Gd158        | HLA-DR          | L243         | Biolegend       |
| Tb159        | CCR7            | G043H7       | Fluidigm        |
| Gd160        | CD14            | M5E2         | Fluidigm        |
| Dy161        | CD34            | 561          | Biolegend       |
| Dy162        | CD11c           | Bu15         | Fluidigm        |
| Dy163        | CD3             | UCTH1        | Biolegend       |
|              | CD19            | HIB19        | Biolegend       |
|              | CD66b           | G10F5        | Biolegend       |
| Dy164        | CD115 (CSF1R)   | 9-4D2-1E4    | BD Pharmingen   |
| Ho165        | SIGLEC6-PE      | 767329       | R&D Systems     |
| Er166        | CD116 (GMCSFR)  | 4H1          | Biolegend       |
| Er167        | CD117 (c-kit)   | 104D2        | Biolegend       |
| Er168        | CX3CR1          | K0124E1      | Biolegend       |
| Tm169        | AXL             | 108724       | Biolegend       |
| Er170        | CLEC9A          | 8F9          | Biolegend       |
| Er171        | CD135 (FLT3)    | BV10A4H2     | Biolegend       |
| Yb172        | CD81            | 5A6          | Biolegend       |
| Yb173        | BDCA3 (CD141)   | 1A4          | Fluidigm        |
| Yb174        | IRF8-APC        | V3GYWCH      | eBioscience     |
| Lu175        | CADM1           | 3E1          | MBL             |
| Yb176        | CD5             | UCTH2        | Biolegend       |
